# Supplementary material for: Repertoire, unified nomenclature and evolution of the Type III effector gene set in the Ralstonia solanacearum species complex
Source: PubMed Central journal article supplement (PMC3878972; doi:10.1186/1471-2164-14-859), 2013-12-06

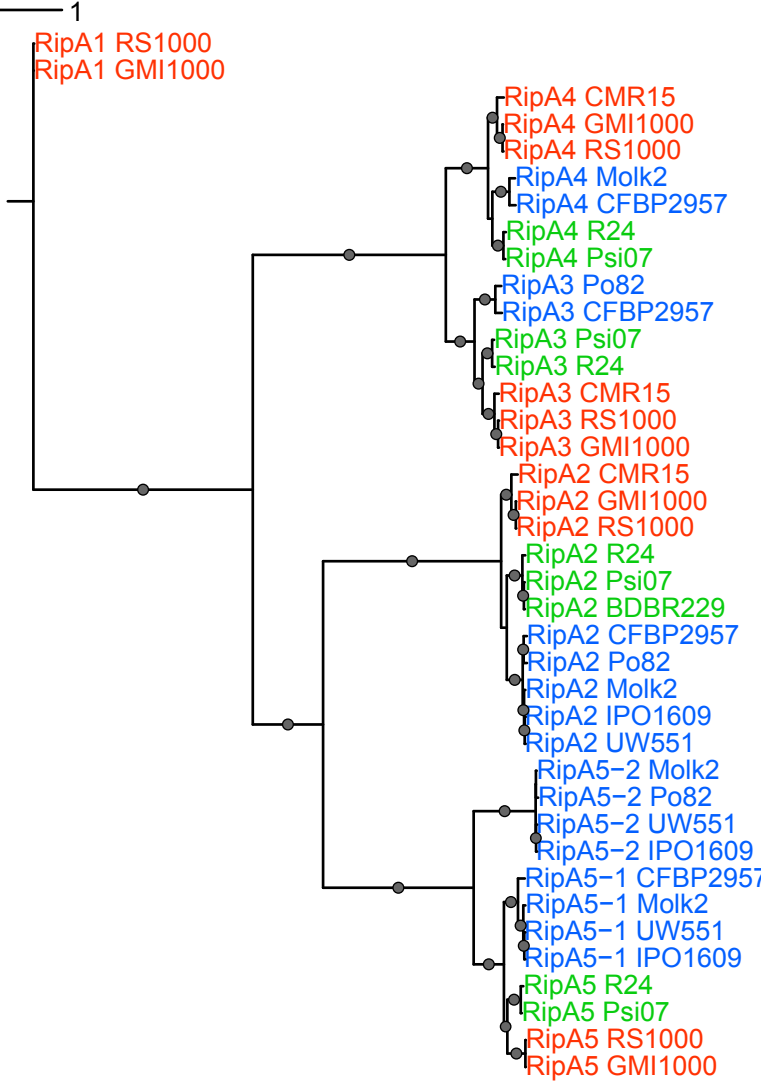

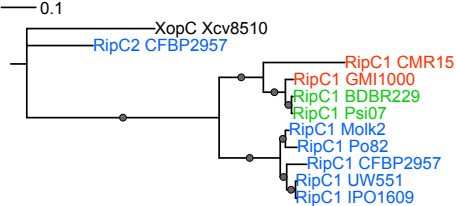

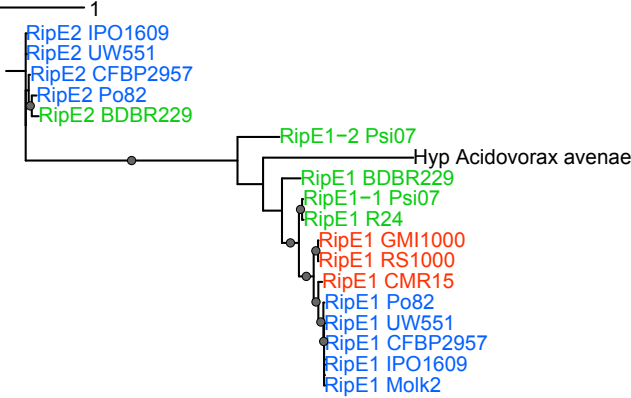

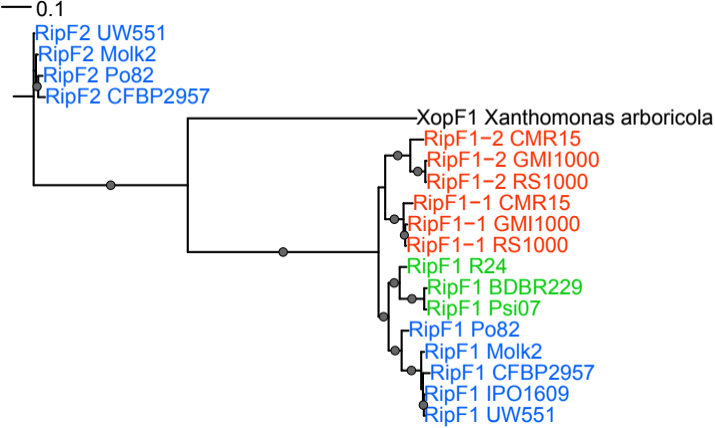

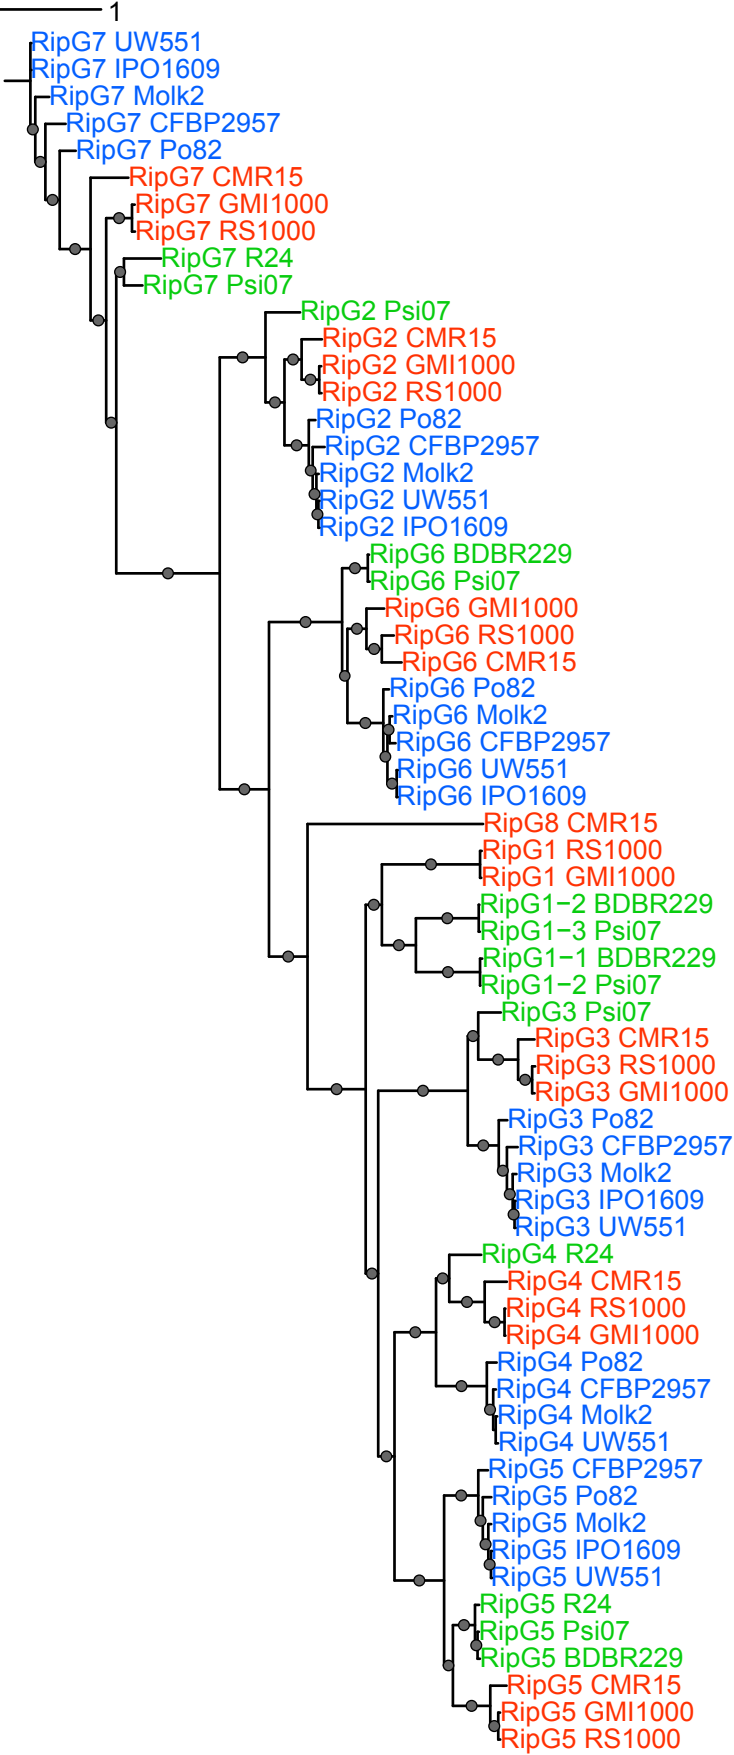

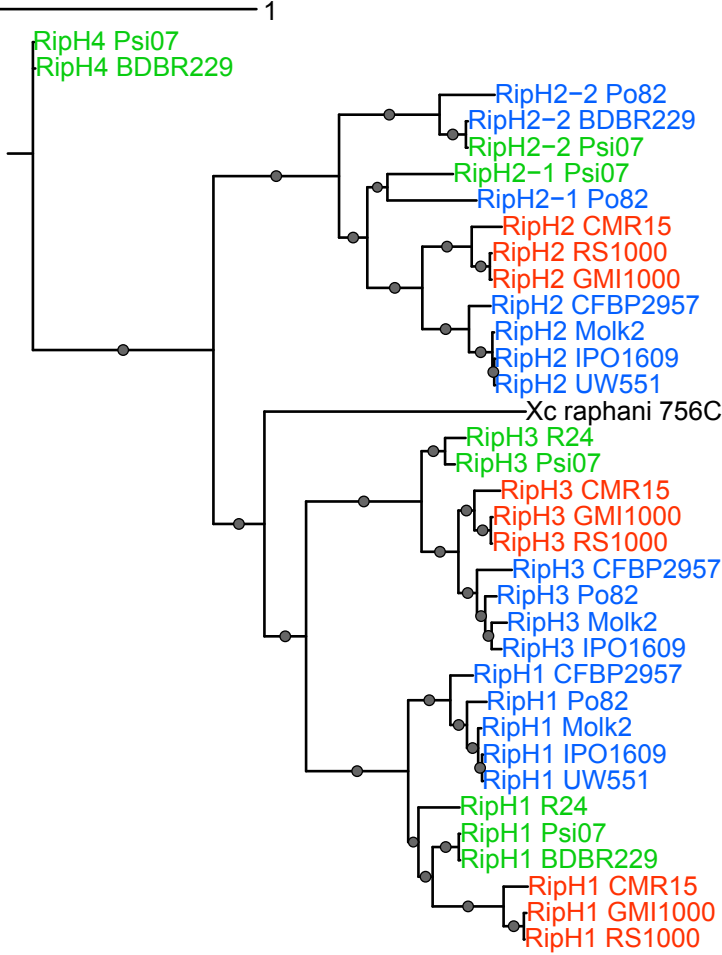

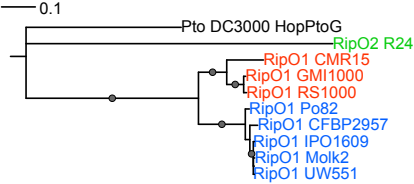

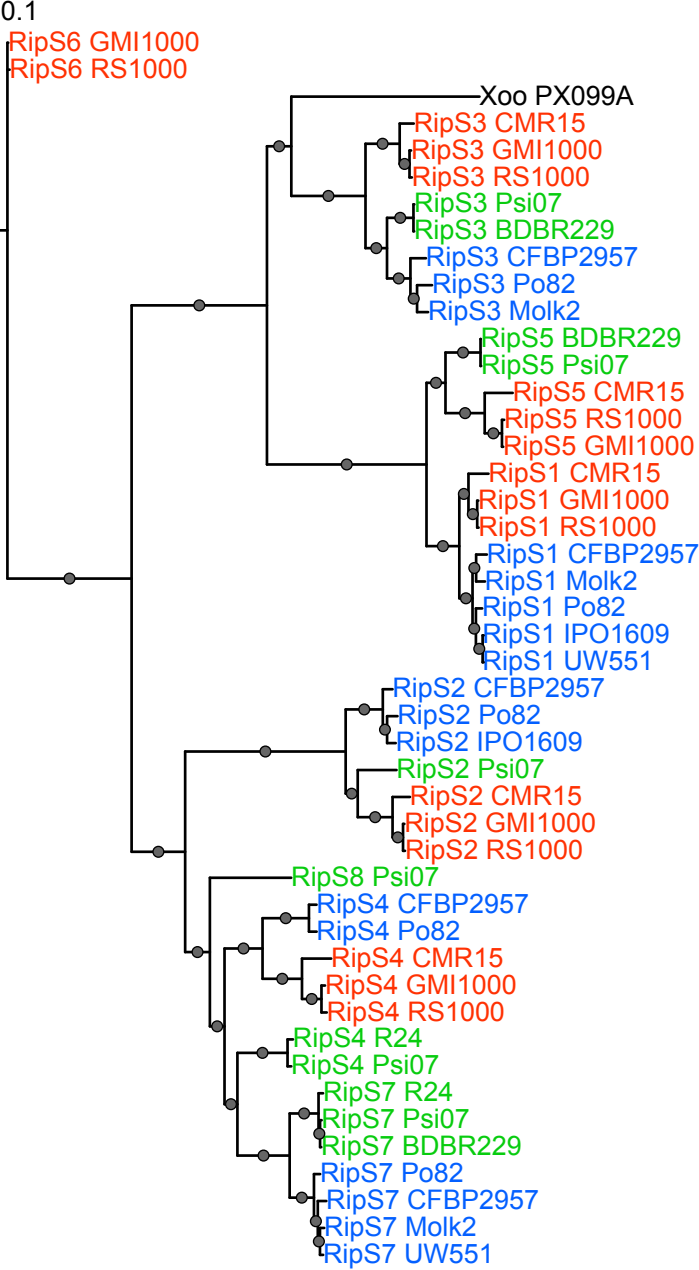



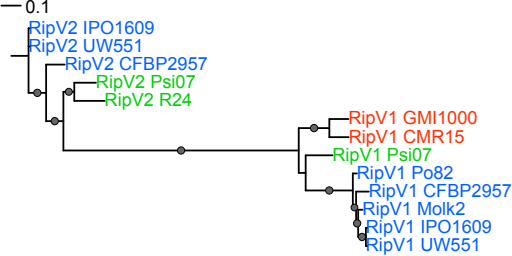

0.1

HopF2 DC3000

RipAF2 R24

RipAF1 Po82

RipAF1 CFBP2957

RipAF1 CMR15

RipAF1 RS1000

RipAF1 GMI1000

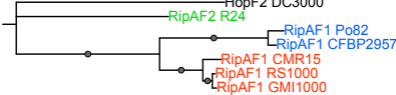

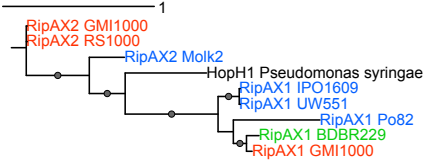

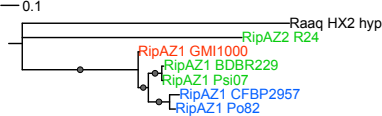

Supplement: 1471-2164-14-859-S4.pdf [file 1471-2164-14-859-S4.pdf]
